# Supplementary material for: Mercury poisoning in women and infants inhabiting the Gangetic plains of Bihar: risk assessment
Source: Springer Nature journal article supplement (doi:10.1186/s12889-025-22336-9), 2025-04-04
Supplement: MOESM1 [file 12889_2025_22336_MOESM1_ESM.pdf]

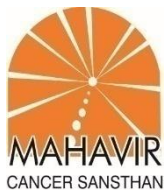

**Mahavir Cancer Sansthan & Research Centre**  
**Phulwarisharif, Patna**

**Project: Assessment of Female reproductive health and  
child health risks in Arsenic Exposed population of  
Bihar**

**Village:-**

**Name:**

**Age:**

**Sex:**

**House hold Name:**

**Mobile No.**

**Members in House hold:**

**Female Member Details:**

**Children Details:**

**GPS Location:**

**Source of Drinking Water:**

**Depth of HP:**

**Age H.P**

**Disease History:**

**Cancer Patients in Family History:**

**Water Sample Collection Code:**

**Food Sample Collection Code:**

**Blood Sample Collection Code:**

**Urine Sample Collection Code:**

**Breast milk Sample Collection Code:**

**Hair / Nail Sample Collection Code:**

**Child: Saliva collection Code:**

**Child: Urine collection Code:**

**Data Collected by:**

**(PI Signature)**

**Date:**

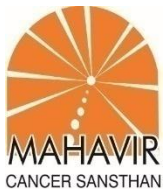

## **FEMALE - Clinical Details**

### **1. Appearance:**

Normal ☐ Marks of Arsenicosis ☐ Weight ☐ Age:

### **2. Any Skin Lesion**

Palm ☐ Sole ☐ Trunk ☐ Limbs ☐  
Chest ☐ Back ☐ Any Others ☐

### **3. Any Nodular Change**

Area ☐

### **4. Any other Problem**

Gastritis ☐ Anaemia ☐ Constipation ☐ Diarrhoea ☐ Loss of ☐  
Appetite

### **5. Any Systemic Disease**

Heart ☐ Lungs ☐ Abdomen ☐ Diabetes ☐  
BP ☐ Others ☐ \_\_\_\_\_

### **6. On Any Medication**

Duration ☐

### **7. For how much time they are using a water:**

### **8. Menstrual status:**

### **9. Lactation Duration:**

Data Collected by:

(PI Signature)

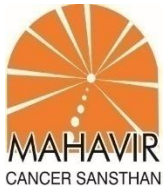

## CHILD - Clinical Details

### 1. Appearance:

Normal ☐ Marks of Arsenicosis ☐ Age: \_\_\_\_\_ Gender: M / F

Weight ☐

### 2. Any Skin Lesion

Palm ☐ Sole ☐ Trunk ☐ Limbs ☐

Chest ☐ Back ☐ Any Others ☐

### 3. Any Nodular Change

Area ☐

### 4. Any other Problem

Gastritis ☐ Anaemia ☐ Constipation ☐ Diarrhoea ☐ Loss of ☐  
Appetite

### 5. Any Systemic Disease

Heart ☐ Lungs ☐ Abdomen ☐ Diabetes ☐

BP ☐ Others ☐ \_\_\_\_\_

### 6. On Any Medication

Duration \_\_\_\_\_

### 7. Child Details (Neurological or other problems) :

### 8. Any Development Issue:

Vision ☐ Hearing ☐ Speaking ☐ Movement ☐ Others ☐
